# Supplementary material
Source: PubMed Central journal article supplement (PMC3594045)
Supplement: NIHMS437098-supplement-1.pdf [file NIHMS437098-supplement-1.pdf]

# Supplementary Information

**for:** Transcription dependent dynamic supercoiling is a short range genomic force  
Fedor Kouzine, Ashutosh Gupta, Laura Branello, Damian Wojtowicz, Khadija Ben-Aissa, Juhong Liu, Teresa M. Przytycka and David Levens

- Supplementary Figure 1:  $\Delta$ CL profiles at different regions of the genome.
- Supplementary Figure 2: Kinetics of  $\gamma$ -H2AX formation and CHK2 phosphorylation (P-CHK2) following  $\beta$ -Lapachone ( $\beta$ -LAP) or Etoposide (ETO) treatments for the indicated times.
- Supplementary Figure 3:  $\Delta$ CL profiles in a 4 kb region centered on TSSs in presence or absence of camptothecin (CPT) or  $\beta$ -LAP
- Supplementary Table 1: List of transcribed Regions
- Supplementary Table 2: List of all detection primers used for qPCR
- Supplementary Note: Extracting supercoiling signals from noisy genomic data  
Ashutosh Gupta and David Levens

## Supplementary Figures

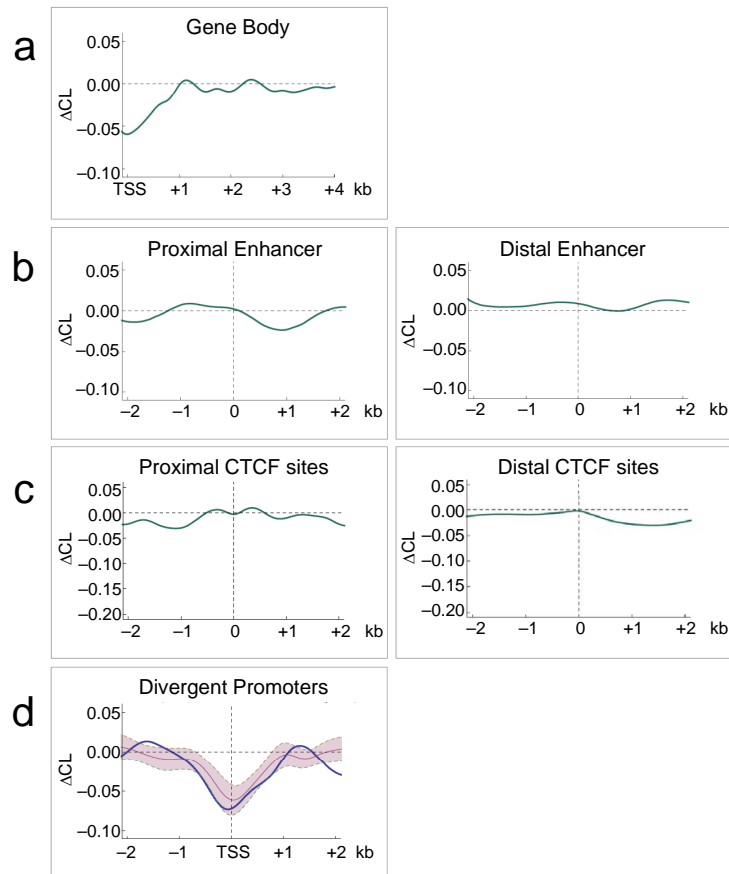

Supplementary Figure 1:  $\Delta CL$  profiles at different regions of the genome. (a) The average  $\Delta CL$  profile for all genes starting from the TSS to 4 kb into the gene body (Suppl. Note 3.5). (b) The average  $\Delta CL$  profile for all enhancers that are in or within  $\pm 3,000$  bp of the gene body (proximal) or are more than  $\pm 3,000$  bp away from the gene body (distal). Only enhancers with significant Pol II signal were considered (Suppl. Note 3.6). (c) The average  $\Delta CL$  profile for all CTCF sites that are in or within  $\pm 3,000$  bp of the gene body (proximal) or are more than  $\pm 3,000$  bp away from the gene body (distal) (Suppl. Note 3.6). (d) The average  $\Delta CL$  profile about the TSS for all divergent promoters that are separated by a minimum of 100 bp or a maximum of 4,000 bp. The shaded range shows the  $\mu \pm \sigma$  region obtained by averaging 30 randomizations of an equivalent number of genes excluding divergent promoters (Suppl. Note 3.7).

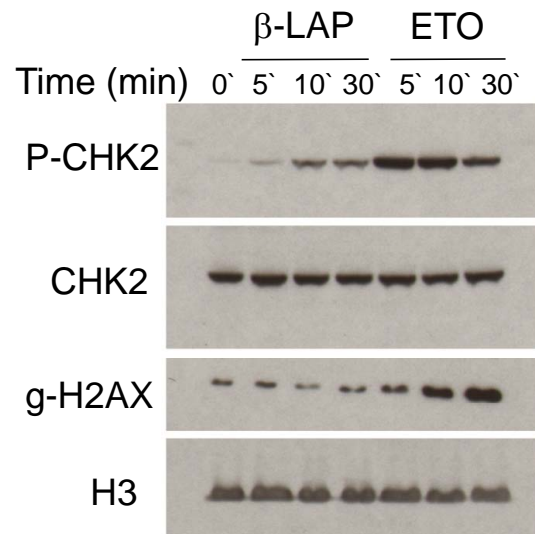

Supplementary Figure 2: Kinetics of  $\gamma$ -H2AX formation and CHK2 phosphorylation (P-CHK2) following  $\beta$ -LAP or Etoposide (ETO) treatments for the indicated times. Equal loading is shown by histone H3 and total CHK2 detection.

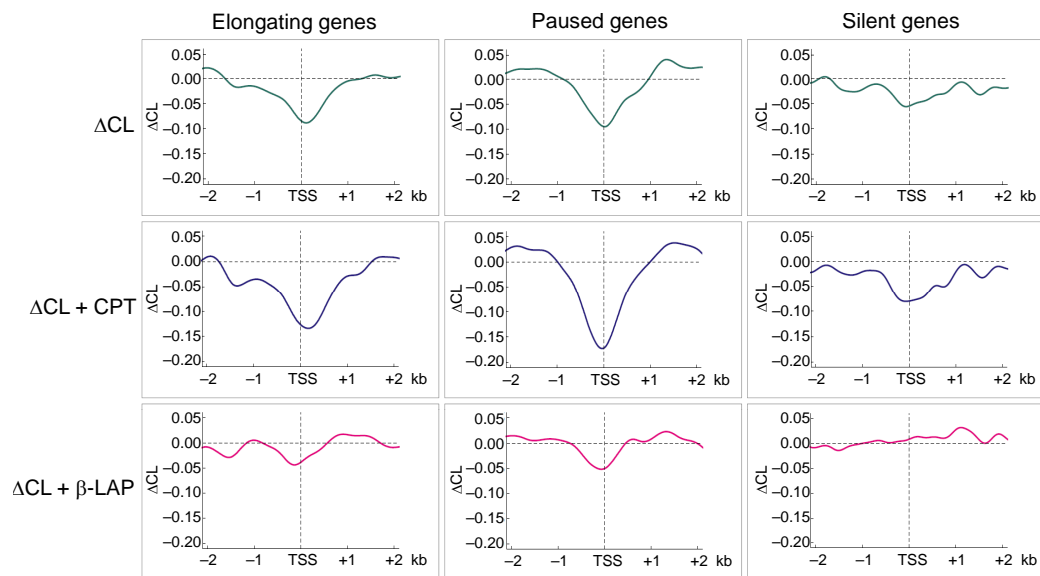

Supplementary Figure 3:  $\Delta$ CL profiles in a 4 kb region centered on TSSs in presence or absence of CPT or  $\beta$ -LAP. According to the pausing index (Suppl. Note 3.4) genes were grouped in 3 categories: elongating (left panel), paused (central panel) and silent (right panel).

## Supplementary Tables

Table 1: List of transcribed regions

| #  | chr | Start Site | End Site  | Accession # |
|----|-----|------------|-----------|-------------|
| 1  | 19  | 59107802   | 59137444  | 59284       |
| 2  | 19  | 59107882   | 59138080  | 59284       |
| 3  | 20  | 33573306   | 33574658  | 343705      |
| 4  | 6   | 74135002   | 74136236  | 441161      |
| 5  | 20  | 33578212   | 33580862  | 140873      |
| 6  | 6   | 74129120   | 74130615  | 154288      |
| 7  | 6   | 74119507   | 74120674  | 340168      |
| 8  | 15  | 41772375   | 41778712  | 548596      |
| 9  | X   | 153152125  | 153176632 | 1527        |
| 10 | X   | 153101360  | 153114725 | 2652        |
| 11 | 15  | 41673536   | 41678892  | 548596      |
| 12 | X   | 153062933  | 153077705 | 5956        |
| 13 | 20  | 33484240   | 33486662  | 554250      |
| 14 | 20  | 33484562   | 33489441  | 8200        |
| 15 | X   | 153533444  | 153535036 | 30848       |
| 16 | 19  | 59927813   | 60070473  | AF285439    |
| 17 | X   | 153466704  | 153468263 | 653387      |
| 18 | 1   | 149603404  | 149611805 | 8991        |
| 19 | 20  | 33336947   | 33343639  | 128876      |
| 20 | 20  | 33652037   | 33656662  | 80307       |
| 21 | 1   | 149779404  | 149822683 | 7286        |
| 22 | 20  | 33609920   | 33651008  | 80307       |
| 23 | 11  | 5558682    | 5559690   | 340980      |
| 24 | 6   | 74161191   | 74183791  | 55510       |
| 25 | 6   | 73975313   | 74029640  | 80759       |
| 26 | X   | 153556723  | 153632526 | 139716      |
| 27 | X   | 153499058  | 153500716 | 246100      |
| 28 | X   | 153717262  | 153904192 | 2157        |
| 29 | 11  | 4799191    | 4800220   | 119694      |
| 30 | 19  | 59739981   | 59748862  | 90011       |
| 31 | 11  | 4901179    | 4902145   | 79324       |
| 32 | X   | 153177344  | 153211894 | 8277        |
| 33 | X   | 153660161  | 153686957 | 4354        |
| 34 | 11  | 4826042    | 4827014   | 119692      |

Continued on next page

**Table 1 – continued from previous page**

| <b>#</b> | <b>chr</b> | <b>Start Site</b> | <b>End Site</b> | <b>Accession #</b> |
|----------|------------|-------------------|-----------------|--------------------|
| 35       | 11         | 5230996           | 5232587         | 3048               |
| 36       | 11         | 5036455           | 5037433         | 119678             |
| 37       | 6          | 74191313          | 74218720        | 115004             |
| 38       | 11         | 5109497           | 5110448         | 390054             |
| 39       | 11         | 5329313           | 5330252         | 390058             |
| 40       | 11         | 5024331           | 5025267         | 119679             |
| 41       | 11         | 5400006           | 5400960         | 390061             |
| 42       | 11         | 5177540           | 5178506         | 283111             |
| 43       | 19         | 59265068          | 59269173        | 441864             |
| 44       | 11         | 4923964           | 4924906         | 401666             |
| 45       | 11         | 4932577           | 4933519         | 401667             |
| 46       | 11         | 5522366           | 5523329         | 390067             |
| 47       | 22         | 31080871          | 31087147        | 10738              |
| 48       | 11         | 5492198           | 5494501         | 143630             |
| 49       | 22         | 31085892          | 31097063        | 10737              |
| 50       | 22         | 30875518          | 30885243        | 150297             |
| 51       | 11         | 4746784           | 4747723         | 256892             |
| 52       | 19         | 59187353          | 59207732        | 59285              |
| 53       | 19         | 59077278          | 59102713        | 5582               |
| 54       | 6          | 108593954         | 108616706       | 7101               |
| 55       | 9          | 131123115         | 131127005       | 414318             |
| 56       | 11         | 4859624           | 4860689         | 401665             |
| 57       | 6          | 41411504          | 41426593        | 9436               |
| 58       | 22         | 30769258          | 30836645        | 6523               |
| 59       | 15         | 41597132          | 41611110        | 4130               |
| 60       | 11         | 4965999           | 4970235         | 56547              |
| 61       | 22         | 30916425          | 30930718        | 10739              |
| 62       | 22         | 30944462          | 30981318        | 6527               |
| 63       | X          | 152780580         | 152794505       | 3897               |
| 64       | 22         | 31526801          | 31589028        | 7078               |
| 65       | 20         | 33506563          | 33563216        | 11190              |
| 66       | 22         | 31238539          | 31732683        | 8224               |
| 67       | 22         | 31239399          | 31784329        | 8224               |
| 68       | 6          | 41829976          | 41834895        | 647014             |
| 69       | 5          | 131315195         | 131375214       | 23305              |
| 70       | 5          | 131424245         | 131426795       | 3562               |
| 71       | 5          | 131170738         | 131357870       | 23305              |
| 72       | 22         | 31140289          | 31183373        | 254240             |

Continued on next page

**Table 1 – continued from previous page**

| <b>#</b> | <b>chr</b> | <b>Start Site</b> | <b>End Site</b> | <b>Accession #</b> |
|----------|------------|-------------------|-----------------|--------------------|
| 73       | 5          | 131317500         | 131375553       | 23305              |
| 74       | 11         | 4892524           | 4893469         | 81282              |
| 75       | 11         | 4976788           | 4977736         | 119682             |
| 76       | 5          | 141953305         | 142045812       | 2246               |
| 77       | X          | 153452672         | 153453380       | 286967             |
| 78       | 22         | 31087313          | 31107216        | 646618             |
| 79       | 5          | 131556201         | 131590834       | 8974               |
| 80       | X          | 152891434         | 152901834       | 8269               |
| 81       | 11         | 4885175           | 4886114         | 119687             |
| 82       | 11         | 5466512           | 5467469         | 390066             |
| 83       | 22         | 31039083          | 31041792        | 646599             |
| 84       | 11         | 5431294           | 5432233         | 390064             |
| 85       | X          | 152853916         | 152863426       | 5973               |
| 86       | 5          | 131905034         | 131907113       | 3567               |
| 87       | 11         | 131033416         | 131038060       | 399980             |
| 88       | 6          | 132309645         | 132314155       | 1490               |
| 89       | 11         | 5367204           | 5368185         | 390059             |
| 90       | 11         | 4781238           | 4782423         | 119695             |
| 91       | 13         | 112808105         | 112822346       | 2155               |
| 92       | 19         | 59158105          | 59177951        | 59283              |
| 93       | X          | 153908257         | 153938385       | 65991              |
| 94       | 2          | 234316134         | 234317400       | 414061             |
| 95       | 21         | 32706622          | 32809568        | 59271              |
| 96       | 11         | 130745778         | 131710752       | 50863              |
| 97       | 21         | 32866419          | 32870062        | 55264              |
| 98       | 11         | 5203270           | 5204877         | 3043               |
| 99       | 11         | 5246158           | 5483410         | 3046               |
| 100      | 5          | 131466369         | 131511544       | 645029             |
| 101      | 11         | 5129236           | 5130175         | 23538              |
| 102      | 11         | 5714253           | 5716328         | 387748             |
| 103      | 21         | 33084854          | 33107868        | 56245              |
| 104      | 20         | 33720024          | 33750688        | 9054               |
| 105      | 5          | 132225179         | 132228124       | 2661               |
| 106      | 22         | 30845512          | 30846923        | 646580             |
| 107      | 11         | 5573934           | 5590217         | 117854             |
| 108      | 11         | 116196627         | 116199221       | 337                |
| 109      | 11         | 5210634           | 5212434         | 3045               |
| 110      | 9          | 130978873         | 131012683       | 389792             |

Continued on next page

**Table 1 – continued from previous page**

| <b>#</b> | <b>chr</b> | <b>Start Site</b> | <b>End Site</b> | <b>Accession #</b> |
|----------|------------|-------------------|-----------------|--------------------|
| 111      | 6          | 41714230          | 41729959        | 4188               |
| 112      | 11         | 5098469           | 5099384         | 390053             |
| 113      | 7          | 27134534          | 27136924        | 3201               |
| 114      | 1          | 149851285         | 149938183       | 81609              |
| 115      | 1          | 149851164         | 149933599       | 81609              |
| 116      | X          | 152799320         | 152807619       | 643736             |
| 117      | 21         | 32870732          | 32879687        | 140290             |
| 118      | 18         | 59455481          | 59462470        | 6318               |
| 119      | 21         | 33066281          | 33093160        | 54067              |
| 120      | 11         | 5485107           | 5487744         | 50613              |
| 121      | 19         | 59705824          | 59713709        | 3904               |
| 122      | 21         | 33779706          | 33785650        | 54943              |
| 123      | 5          | 131612501         | 131658907       | BC030525           |
| 124      | 19         | 59510164          | 59516221        | 353514             |
| 125      | 2          | 234209886         | 234343242       | 54575              |
| 126      | 18         | 59455932          | 59479430        | AF428135           |
| 127      | 5          | 132111041         | 132118263       | 645121             |
| 128      | 1          | 149750499         | 149777792       | 57530              |
| 129      | 13         | 112349358         | 112386812       | 400165             |
| 130      | 9          | 130896893         | 130912904       | 1384               |
| 131      | 7          | 127020924         | 127029079       | 29999              |
| 132      | 5          | 131658043         | 131707798       | 6583               |
| 133      | 18         | 59473411          | 59480098        | 6317               |
| 134      | 11         | 5641363           | 5662869         | 85363              |
| 135      | X          | 153943079         | 153952830       | 4515               |
| 136      | 2          | 234333657         | 234346684       | 54658              |
| 137      | 7          | 27106497          | 27108919        | 3199               |
| 138      | X          | 153254304         | 153256200       | AK125630           |
| 139      | 21         | 39699654          | 39739529        | 150082             |
| 140      | 11         | 64079673          | 64095575        | 55867              |
| 141      | 7          | 27151640          | 27153893        | 3203               |
| 142      | 7          | 27191681          | 27198951        | 646692             |
| 143      | 11         | 63934128          | 63944265        | 644541             |
| 144      | 6          | 41812427          | 41823099        | 5225               |
| 145      | 5          | 131621285         | 131637046       | 8572               |
| 146      | 7          | 27160814          | 27162821        | 3204               |
| 147      | 21         | 39739666          | 39809303        | 6450               |
| 148      | X          | 122923269         | 123064027       | 10735              |

Continued on next page

**Table 1 – continued from previous page**

| <b>#</b> | <b>chr</b> | <b>Start Site</b> | <b>End Site</b> | <b>Accession #</b> |
|----------|------------|-------------------|-----------------|--------------------|
| 149      | 9          | 131138623         | 131140395       | AK092192           |
| 150      | X          | 153952903         | 154004543       | 79184              |
| 151      | 11         | 5574461           | 5622204         | 445372             |
| 152      | 21         | 32922943          | 33022148        | 8867               |
| 153      | 21         | 33782367          | 33785893        | 54943              |
| 154      | 2          | 234490781         | 234592905       | 79054              |
| 155      | 11         | 2118322           | 2126470         | 51214              |
| 156      | 5          | 56240856          | 56248767        | 133383             |
| 157      | 13         | 112670814         | 112800864       | 23263              |
| 158      | 2          | 234624084         | 234650515       | 6694               |
| 159      | X          | 122922235         | 123063026       | 10735              |
| 160      | 7          | 125865894         | 126670548       | 2918               |
| 161      | 7          | 115952074         | 115988466       | 857                |
| 162      | 21         | 32869022          | 32870472        | 55264              |
| 163      | 7          | 27187653          | 27191355        | 3207               |
| 164      | 18         | 59528407          | 59541613        | 89778              |
| 165      | 7          | 27168581          | 27171674        | 3205               |
| 166      | 11         | 63973121          | 63975702        | 439914             |
| 167      | 7          | 117137940         | 117300797       | 83992              |
| 168      | 21         | 33936653          | 34183479        | 6453               |
| 169      | 7          | 116790511         | 116854779       | 136991             |
| 170      | 18         | 23784932          | 24011189        | 1000               |
| 171      | 7          | 116704517         | 116750579       | 7472               |
| 172      | 21         | 33320108          | 33323370        | 10215              |
| 173      | 22         | 30659507          | 30671336        | 25775              |
| 174      | 15         | 41652602          | 41769512        | 9677               |
| 175      | 18         | 59593623          | 59623592        | 8710               |
| 176      | 11         | 116165295         | 116167794       | 116519             |
| 177      | 7          | 113842511         | 114117391       | 93986              |
| 178      | 7          | 113842287         | 114117218       | 93986              |
| 179      | 7          | 27147520          | 27149812        | 3202               |
| 180      | 6          | 108722790         | 108950951       | 246269             |
| 181      | 21         | 34243099          | 34258130        | 400863             |
| 182      | 11         | 2273445           | 2279866         | 29125              |
| 183      | 7          | 116907252         | 117095951       | 1080               |
| 184      | 11         | 2106925           | 2109541         | 492304             |
| 185      | 7          | 89712444          | 89777638        | 79846              |
| 186      | 7          | 115926679         | 115935831       | 858                |

Continued on next page



**Table 1 – continued from previous page**

| <b>#</b> | <b>chr</b> | <b>Start Site</b> | <b>End Site</b> | <b>Accession #</b> |
|----------|------------|-------------------|-----------------|--------------------|
| 187      | 7          | 89678935          | 89704865        | 261729             |
| 188      | 7          | 89678993          | 89704927        | 261729             |
| 189      | 2          | 220016639         | 220039828       | 10290              |
| 190      | 7          | 89621624          | 89632077        | 26872              |
| 191      | 18         | 59705921          | 59722100        | 5055               |
| 192      | 19         | 59289813          | 59297806        | 126014             |
| 193      | 13         | 29674766          | 29779163        | 84056              |
| 194      | 2          | 219991342         | 219999705       | 1674               |
| 195      | 11         | 64114857          | 64126396        | 116085             |
| 196      | 7          | 27112333          | 27125739        | 3200               |
| 197      | 13         | 29680608          | 29779584        | 84056              |
| 198      | 2          | 220087135         | 220106998       | 55515              |
| 199      | 2          | 234351720         | 234406802       | 339766             |
| 200      | 21         | 33883516          | 33935936        | 9946               |
| 201      | 15         | 41906499          | 41946502        | 79968              |
| 202      | 11         | 2109739           | 2116400         | AK074614           |
| 203      | 7          | 27121491          | 27129028        | AK056230           |
| 204      | 5          | 132114415         | 132140966       | 23176              |
| 205      | 12         | 38905085          | 39051870        | 120892             |
| 206      | 19         | 59289744          | 59295960        | 126014             |
| 207      | 13         | 112825145         | 112851842       | 2159               |
| 208      | 7          | 27203023          | 27206221        | 3209               |
| 209      | 18         | 59733724          | 59753456        | 5273               |
| 210      | 2          | 220087295         | 220111738       | 55515              |
| 211      | 11         | 116205833         | 116208997       | 345                |
| 212      | 11         | 64130221          | 64247236        | 9379               |
| 213      | 6          | 41845891          | 41855608        | 10817              |
| 214      | 11         | 2110355           | 2116780         | 3481               |
| 215      | X          | 122821728         | 122875503       | 331                |
| 216      | 7          | 27099136          | 27102119        | 3198               |
| 217      | 7          | 114349444         | 114446492       | 29969              |
| 218      | 11         | 1953071           | 1956250         | AK126915           |
| 219      | 11         | 1972983           | 1975280         | 283120             |
| 220      | 14         | 98705376          | 98807575        | 64919              |
| 221      | 21         | 32687312          | 32688133        | 84996              |
| 222      | 10         | 55236344          | 55248144        | 387683             |
| 223      | 5          | 131733342         | 131759205       | 6584               |
| 224      | 2          | 220123699         | 220145134       | 23363              |

Continued on next page

**Table 1 – continued from previous page**

| <b>#</b> | <b>chr</b> | <b>Start Site</b> | <b>End Site</b> | <b>Accession #</b> |
|----------|------------|-------------------|-----------------|--------------------|
| 225      | 7          | 90729032          | 90731910        | 645794             |
| 226      | 11         | 116211678         | 116213548       | 335                |
| 227      | 20         | 33667222          | 33672379        | 6676               |
| 228      | 7          | 27176734          | 27180448        | 3206               |
| 229      | X          | 153282772         | 153293621       | 1774               |
| 230      | 11         | 2279818           | 2296006         | 10077              |
| 231      | 16         | 48057             | 62591           | 64285              |
| 232      | 21         | 39479273          | 39607426        | 54014              |
| 233      | 21         | 39674139          | 39691496        | 7485               |
| 234      | 6          | 108469305         | 108502634       | 28962              |
| 235      | 11         | 2137586           | 2139015         | 3630               |
| 236      | 11         | 1817478           | 1819484         | 7136               |
| 237      | 19         | 59777070          | 59790833        | 11027              |
| 238      | 22         | 30650902          | 30652995        | AK123899           |
| 239      | 5          | 132059221         | 132101163       | 11127              |
| 240      | X          | 153365249         | 153368126       | 8266               |
| 241      | X          | 153368841         | 153372189       | 8273               |
| 242      | 7          | 116099694         | 116225676       | 4233               |
| 243      | 21         | 33364442          | 33366596        | 116448             |
| 244      | 5          | 131437383         | 131439758       | 1437               |
| 245      | 2          | 220200526         | 220214936       | 6508               |
| 246      | 12         | 38629561          | 38786156        | 114134             |
| 247      | 19         | 59557944          | 59568280        | 3903               |
| 248      | 15         | 41815433          | 41825789        | 440278             |
| 249      | 11         | 64270605          | 64284763        | 5837               |
| 250      | 11         | 2141734           | 2149611         | 7054               |
| 251      | 5          | 132185910         | 132189901       | 134549             |
| 252      | 15         | 41612966          | 41669697        | 9677               |
| 253      | 11         | 1897511           | 1916512         | 7140               |
| 254      | 19         | 59064592          | 59071501        | 91663              |
| 255      | 16         | 142853            | 144504          | 3050               |
| 256      | 11         | 64348496          | 64368617        | 55561              |
| 257      | 19         | 59064504          | 59069685        | 91663              |
| 258      | 16         | 258310            | 265915          | 8786               |
| 259      | 21         | 33619083          | 33653999        | 3454               |
| 260      | 7          | 27248945          | 27252717        | 2128               |
| 261      | 2          | 220044627         | 220047344       | AK098307           |
| 262      | 19         | 59668021          | 59676234        | 148170             |

Continued on next page

**Table 1 – continued from previous page**

| <b>#</b> | <b>chr</b> | <b>Start Site</b> | <b>End Site</b> | <b>Accession #</b> |
|----------|------------|-------------------|-----------------|--------------------|
| 263      | 16         | 265611            | 277210          | 64714              |
| 264      | 11         | 1808892           | 1815326         | 90019              |
| 265      | 19         | 59796924          | 59804352        | 11024              |
| 266      | 5          | 56146021          | 56227730        | 4214               |
| 267      | X          | 153293070         | 153303259       | 6901               |
| 268      | 21         | 33872080          | 33882884        | 29980              |
| 269      | 16         | 155972            | 156767          | 445449             |
| 270      | 2          | 220145197         | 220148671       | 3623               |
| 271      | 5          | 56251187          | 56283697        | 166968             |
| 272      | 7          | 90731718          | 90736068        | 8321               |
| 273      | 2          | 234438819         | 234441829       | 151507             |
| 274      | 16         | 261827            | 265981          | 8786               |
| 275      | 19         | 59618416          | 59639892        | 57348              |
| 276      | 9          | 130883226         | 130892538       | 57171              |
| 277      | 7          | 116447578         | 116657391       | 7982               |
| 278      | 6          | 74007762          | 74076659        | CR936715           |
| 279      | 16         | 162874            | 163708          | 3040               |
| 280      | 7          | 90063746          | 90674880        | 5218               |
| 281      | 5          | 132177177         | 132180377       | 134548             |
| 282      | 7          | 89870731          | 89883204        | 9069               |
| 283      | 11         | 2246303           | 2248758         | 430                |
| 284      | 9          | 130747629         | 130749833       | 22845              |
| 285      | 5          | 142130475         | 142586243       | 23092              |
| 286      | 5          | 142130155         | 142582945       | 23092              |
| 287      | 7          | 89813956          | 89858258        | 85865              |
| 288      | 16         | 166678            | 167520          | 3039               |
| 289      | 19         | 59355657          | 59368664        | 147798             |
| 290      | 19         | 59355714          | 59368756        | 147798             |
| 291      | 19         | 59434640          | 59452868        | 79168              |
| 292      | 7          | 90176647          | 90677840        | 5218               |
| 293      | 7          | 116380616         | 116657313       | 7982               |
| 294      | 5          | 131920528         | 132007498       | 10111              |
| 295      | 19         | 59446172          | 59452939        | 10990              |
| 296      | 19         | 59412608          | 59438414        | 11025              |
| 297      | 21         | 33726662          | 33774120        | 757                |
| 298      | 1          | 149641823         | 149698556       | 23126              |
| 299      | X          | 153359307         | 153360790       | 8270               |
| 300      | X          | 153387699         | 153397567       | 60343              |

Continued on next page

**Table 1 – continued from previous page**

| #   | chr | Start Site | End Site  | Accession # |
|-----|-----|------------|-----------|-------------|
| 301 | 11  | 116124098  | 116148914 | 84811       |
| 302 | 2   | 118393639  | 118491788 | 54520       |
| 303 | 13  | 112392643  | 112589470 | 23250       |
| 304 | 15  | 41884024   | 41904243  | 4236        |
| 305 | X   | 152940457  | 153016323 | 4204        |
| 306 | 9   | 130913064  | 130951044 | 5524        |
| 307 | 2   | 234410765  | 234427885 | 55355       |
| 308 | 21  | 39469253   | 39477310  | 8624        |
| 309 | 22  | 30480068   | 30633001  | 9681        |
| 310 | 1   | 149521414  | 149531005 | 57592       |
| 311 | 9   | 130978768  | 130980347 | 389792      |
| 312 | 7   | 116289798  | 116346549 | 830         |
| 313 | 19  | 59386005   | 59389333  | 79042       |
| 314 | 9   | 130839073  | 130874172 | 84895       |
| 315 | 7   | 127007917  | 127012890 | 79571       |
| 316 | 2   | 118389618  | 118390940 | 54520       |
| 317 | 9   | 130749797  | 130809195 | 23511       |
| 318 | 19  | 59491665   | 59496050  | 11026       |
| 319 | 2   | 220116988  | 220123561 | 130612      |
| 320 | 22  | 31110991   | 31113822  | 646621      |
| 321 | 21  | 33028083   | 33066040  | 94104       |
| 322 | 19  | 59664787   | 59666706  | 94059       |
| 323 | 11  | 64250958   | 64269504  | 10235       |
| 324 | 21  | 33021613   | 33022627  | 644266      |
| 325 | 21  | 39607756   | 39608756  | 257357      |
| 326 | X   | 153412799  | 153428663 | 2539        |
| 327 | 21  | 33560541   | 33591390  | 3588        |
| 328 | 21  | 32895965   | 32906784  | 56683       |
| 329 | 12  | 38904567   | 38905165  | 642606      |
| 330 | 16  | 372247     | 382955    | 645631      |
| 331 | X   | 153310214  | 153318055 | 537         |
| 332 | 22  | 30670478   | 30683590  | 7533        |
| 333 | 16  | 277440     | 342465    | 8312        |
| 334 | 19  | 59351188   | 59355258  | 79165       |
| 335 | 20  | 33593191   | 33608819  | 51614       |
| 336 | 22  | 31201223   | 31224818  | 25793       |
| 337 | 16  | 170334     | 171178    | 3049        |
| 338 | 21  | 33798138   | 33836286  | 2618        |

Continued on next page

**Table 1 – continued from previous page**

| <b>#</b> | <b>chr</b> | <b>Start Site</b> | <b>End Site</b> | <b>Accession #</b> |
|----------|------------|-------------------|-----------------|--------------------|
| 339      | 20         | 33750740          | 33752294        | 140823             |
| 340      | 16         | 43016             | 47444           | 79622              |
| 341      | 6          | 108639409         | 108689156       | 8724               |
| 342      | X          | 152823563         | 152825834       | 554                |
| 343      | X          | 153339816         | 153355179       | 55558              |
| 344      | 5          | 132021763         | 132024700       | 3596               |
| 345      | 16         | 224801            | 258971          | 83986              |
| 346      | 22         | 31113568          | 31138235        | 51493              |
| 347      | 16         | 67017             | 75845           | 4350               |
| 348      | 22         | 30222260          | 30344534        | 9814               |
| 349      | 6          | 41856466          | 41865609        | 29964              |
| 350      | 5          | 132235912         | 132238286       | 116842             |
| 351      | 16         | 23876             | 26382           | 645582             |
| 352      | 1          | 149531036         | 149565348       | 5298               |
| 353      | 1          | 149437652         | 149488630       | 8394               |
| 354      | 1          | 149493820         | 149506560       | 5710               |
| 355      | 20         | 33330138          | 33336008        | 3692               |
| 356      | 1          | 149531231         | 149566511       | 5298               |
| 357      | 11         | 1730560           | 1741798         | 1509               |
| 358      | 19         | 59368920          | 59385478        | 79143              |
| 359      | 11         | 64313184          | 64327289        | 5871               |
| 360      | 16         | 415668            | 512482          | 9727               |
| 361      | 16         | 361859            | 371908          | 58986              |
| 362      | X          | 153429255         | 153446455       | 8517               |
| 363      | 22         | 30165350          | 30215810        | 56478              |
| 364      | 7          | 126797588         | 126820003       | 168850             |
| 365      | 21         | 34197626          | 34210028        | 539                |
| 366      | 5          | 132037271         | 132046267       | 3565               |
| 367      | X          | 122821265         | 122822820       | 643547             |
| 368      | 16         | 357396            | 360541          | 10573              |
| 369      | 16         | 387773            | 402487          | 26063              |
| 370      | 22         | 30402241          | 30438731        | 253143             |
| 371      | 16         | 356981            | 360226          | 10573              |
| 372      | 19         | 59866263          | 59873622        | 11006              |
| 373      | 2          | 220111921         | 220116682       | 79586              |
| 374      | 6          | 108298214         | 108386086       | 11231              |
| 375      | 19         | 59536503          | 59542233        | 23547              |
| 376      | 11         | 64418594          | 64441239        | 23130              |

Continued on next page

**Table 1 – continued from previous page**

| <b>#</b> | <b>chr</b> | <b>Start Site</b> | <b>End Site</b> | <b>Accession #</b> |
|----------|------------|-------------------|-----------------|--------------------|
| 377      | 9          | 130810133         | 130830400       | 56904              |
| 378      | 19         | 59412548          | 59418709        | 11025              |
| 379      | 2          | 118310049         | 118312244       | 389024             |
| 380      | 2          | 118288724         | 118306423       | 8886               |
| 381      | 11         | 1925113           | 1934408         | 6150               |
| 382      | 7          | 115637816         | 115686073       | 26136              |
| 383      | 6          | 41622141          | 41678100        | 116113             |
| 384      | X          | 153325695         | 153334051       | 9130               |
| 385      | X          | 153260980         | 153263075       | 2010               |
| 386      | 7          | 127015694         | 127018989       | 381                |
| 387      | 2          | 220071856         | 220079955       | 29926              |
| 388      | 11         | 116154485         | 116163949       | 8882               |
| 389      | 21         | 39420865          | 39421836        | 391282             |
| 390      | 22         | 30411027          | 30439831        | 253143             |
| 391      | 21         | 39636110          | 39642917        | 3150               |
| 392      | 22         | 30160554          | 30164552        | AK127132           |
| 393      | 19         | 59470017          | 59476753        | 10288              |
| 394      | 20         | 33754944          | 33793607        | 9584               |
| 395      | X          | 152848570         | 152853662       | 8260               |
| 396      | 19         | 59314702          | 59320534        | AK128544           |
| 397      | 20         | 33677379          | 33705245        | 8904               |
| 398      | 15         | 41825881          | 41852096        | 2923               |
| 399      | 16         | 178970            | 219450          | 55692              |
| 400      | 2          | 220170839         | 220189418       | 114790             |
| 401      | 20         | 33700290          | 33716252        | 10137              |
| 402      | 11         | 64302486          | 64303493        | 644613             |
| 403      | 5          | 131774571         | 131825958       | 441108             |
| 404      | 21         | 33837219          | 33871682        | 6651               |
| 405      | 16         | 387192            | 390755          | 4833               |
| 406      | 16         | 36999             | 43625           | 51728              |
| 407      | 15         | 41874456          | 41879547        | 619189             |
| 408      | 11         | 64327563          | 64334764        | 4221               |
| 409      | 21         | 33524100          | 33558697        | 3455               |
| 410      | 11         | 1830883           | 1870068         | 4046               |
| 411      | 19         | 59333260          | 59351239        | 4849               |
| 412      | 8          | 128875987         | 129182678       | 5820               |
| 413      | X          | 153644343         | 153659154       | 1736               |
| 414      | X          | 152929150         | 152938536       | 3654               |

Continued on next page

**Table 1 – continued from previous page**

| <b>#</b> | <b>chr</b> | <b>Start Site</b> | <b>End Site</b> | <b>Accession #</b> |
|----------|------------|-------------------|-----------------|--------------------|
| 415      | 15         | 41852089          | 41856794        | 80237              |
| 416      | 15         | 41879912          | 41882079        | 25764              |
| 417      | 18         | 59767573          | 59778624        | 284293             |
| 418      | 22         | 30345379          | 30388195        | 23761              |
| 419      | 7          | 27029881          | 27031053        | 402643             |
| 420      | 21         | 33697071          | 33731696        | 3460               |
| 421      | 16         | 4081              | 5847            | 375260             |
| 422      | X          | 153318714         | 153325008       | 2664               |
| 423      | X          | 152826026         | 152844908       | 393                |
| 424      | 15         | 41871843          | 41881362        | 25764              |
| 425      | X          | 152866201         | 152883371       | 3054               |
| 426      | 6          | 41759693          | 41810776        | 7942               |
| 427      | 8          | 128816861         | 128821905       | M13930             |
| 428      | 22         | 30344476          | 30356810        | 23761              |
| 429      | 16         | 25950526          | 25951759        | 647915             |
| 430      | 11         | 64376783          | 64402767        | 10938              |
| 431      | 5          | 132230255         | 132231276       | 27089              |
| 432      | X          | 153230158         | 153256123       | 2316               |
| 433      | 18         | 59788242          | 59807588        | 5271               |
| 434      | 19         | 59297971          | 59302080        | 4696               |
| 435      | 1          | 149638664         | 149641036       | 5692               |
| 436      | 8          | 128817497         | 128822856       | 4609               |
| 437      | X          | 153279911         | 153283874       | 6134               |
| 438      | 1          | 149579739         | 149586393       | 5993               |
| 439      | 11         | 5667630           | 5688668         | 10346              |
| 440      | 19         | 59652207          | 59665006        | 114823             |
| 441      | 11         | 64288653          | 64302817        | 7536               |
| 442      | 19         | 59396537          | 59403327        | 6203               |
| 443      | 5          | 131846678         | 131854333       | 3659               |
| 444      | 22         | 30765440          | 30765968        | 402057             |
| 445      | 6          | 74283958          | 74287475        | 1915               |

Table 2: List of all detection primers used for qPCR

| Name | Gene       | Forward Primer 5'>3'       | Reverse Primer 5'>3'   | Level Of Expression |
|------|------------|----------------------------|------------------------|---------------------|
| A    | CKMT1B     | ATCCTCGCATCTTCACTTGG       | ATGAGGCACGACTGGAAAAG   | 0-20%               |
| B    | CKMT1A     | GCATTCAATTCCTTGCTACC       | GAGAGTAAAGGCGAGTGGTGTA | 0-20%               |
| C    | GTA2       | CTGGGTTTCGGCAGTATCAGT      | CCTTTCCTGTGGATCTGACC   | 0-20%               |
| D    | TUFT1      | TAAGGCAATGTGTCCCGC         | GAAAGGCAGGCACCAAGG     | 0-20%               |
| E    | GDF5       | GGATGGTCTCGATCTCCTGA       | CATCATGTGGGAAATTGTGC   | 0-20%               |
| F    | ASCL2      | CTCTGAGACCTCAGGGAACG       | AGGCTGGCAGTAAACACTGG   | 60-80%              |
| G    | PFTK1      | CAAAATAAGGCACCCTACATCTG    | GAGTCCAGTTGTTTGTAGCGG  | 60-80%              |
| H    | ARHGAP26   | TGGCACAGTCTCAGTCACT        | CAGAGCGAGACTCCGTCTC    | 60-80%              |
| I    | MIER3      | AGGAATGGGAGATGGAGACC       | TTCTCTGCCCTGTGATCTT    | 60-80%              |
| J    | HISPPD2A   | CTTGATGCTCCCTTCTTTG        | GCACAACTCTGCCTCTTCC    | 60-80%              |
| K    | PISD       | CACATCTGTGGGAGCAACTG       | CCGCTGGAATTGTATCCTGT   | 80-100%             |
| L    | IRF1       | GGGAGGGTTTCAGTCTAGC        | CCATCACAGCAAACCATCAA   | 80-100%             |
| M    | UQRQ       | GCTGAGGAGAAGTGTGAGC        | GGATGACGCCTTTGTCC      | 80-100%             |
| N    | MYC        | GGACTCAGTCTGGGTGGAAGG      | AAGGAGGAAAACGATGCCTAGA | 80-100%             |
| O    | EEF1A1     | CCTGCGAGTGTGTGTGTG         | GCAAGTGTGGGGTTAGGAA    | 80-100%             |
| P    | Intergenic | GCAGTTCAACCTACAAGCCAATAGAC | CACAAATTAGCGCATTGCCTGA | NA                  |



# Supplementary Note

**For:** Transcription dependent dynamic supercoiling is a short range genomic force

Fedor Kouzine, Ashutosh Gupta, Laura Branello, Damian Wojtowicz, Khadija Ben-Aissa, Juhong Liu, Teresa M. Przytycka and David Levens

## Extracting supercoiling signals from noisy genomic data

Ashutosh Gupta and David Levens

### 1 Discussions

#### 1.1 Reproducibility

Microarrays have been routinely used for the ChIP-chip experiments, where the enrichment of bound sequences is often 10–100 fold higher than the background. However, for the current series of experiments, namely psoralen intercalation, this is not the case. The maximum observed relative enrichment of psoralen photobinding under physiological conditions is approximately two folds [1], as the free energy of intercalation of psoralen in negatively supercoiled DNA is much smaller than the corresponding binding energies of typical antibodies. There is also a finite, although smaller, free energy of intercalation in relaxed DNA. Psoralen binding sites are not focal, but are continuously distributed across the genome. As a result the unprocessed data have a very low signal-to-noise ratio (SNR)<sup>1</sup>, and conventional methods and standards for mapping molecules bound to DNA are inadequate without modification.

Here we present a method developed to study such low energy / low specificity effects. This method is capable of extracting signal from low SNR data (as low as less than  $15^{-2}$ ), it is unsupervised and has been calibrated.<sup>2</sup> The underlying assumption is that the noise is of much higher frequency than the real signal and its uncorrelated to the real signal (which in this case is psoralen-binding<sup>3</sup>).

---

<sup>1</sup>See Suppl. Note 2.1 for definition.

<sup>2</sup>See Suppl. Note 1.2 for calibration details.

<sup>3</sup>Because we don't expect psoralen intercalation (and level of supercoiling) to change abruptly from one base-pair to next, while the microarray data does show high variation.

As an example, we define a hypothetical (low frequency) function and overlay increasing levels of white noise<sup>4</sup> (6 replicates).

The function was designed so that it has a low frequency signal (based on what we observed from our datasets) and distinctive features of different amplitudes (various peaks and valleys of different amplitudes). For this simulation, the chosen noise levels were in a range that was much wider than than the observed noise level from the experiment (see Suppl. Note 3.1 for more).

The noisy data is then smoothed using Fourier Convolution Smoothing [2], and plotted in figure on page 3 along with the raw data, and the original function.

We observe that as the noise level increases, the 6 replicates look increasingly different although they are all derived from the same starting function modified by same level of noise. This suggests that when noise levels are high, we cannot ask for reproducibility 'from individual experiments'.<sup>5</sup>

To achieve reproducibility/reliability we need to repeat the experiment several times.<sup>6</sup> The number of replicates required depends on the level of noise. If the noise levels are low one or two more experiments suffice. For higher noise levels, higher numbers of replicates are needed.

Lets say that we start with four replicates. These can be subdivided into four subsets of three replicates (by dropping one of them). Now if the average profiles of each subset are similar, then there are enough replicates to make a reliable inference from the data. If the averages are not comparable, that means more replicates are required. And so on.

This is the prescription for a generic case where the actual behavior is not known. For the simulation under discussion we have a direct benchmark for comparison, i.e. the original function which was corrupted with different levels of noise. The law of large numbers guarantees an accurate result.

Figure on page 3 suggests that with the average of 6 replicates, we are able to qualitatively regenerate the original function for SNR as low as  $15^{-2}$  (i.e. noise amplitude  $\sim 15$  times that of the signal amplitude).<sup>7</sup>

---

<sup>4</sup>Note that although white noise has a flat frequency spectrum (i.e. all frequencies are present) the net frequency component (power) for any given frequency is much smaller than the signal frequency.

<sup>5</sup>Reproducibility is a fundamental demand of any scientific experiment, and is key for its acceptability and validity. However, under certain stochastic conditions the system can have high degree of variability and exact reproducibility can't be achieved.

<sup>6</sup>Just like one will have to toss a coin several times to test whether its a fair coin or not, just one or two tosses wont be able to give a definitive answer.

<sup>7</sup>This is a conservative estimate, as we were able to recover good correlation for up to

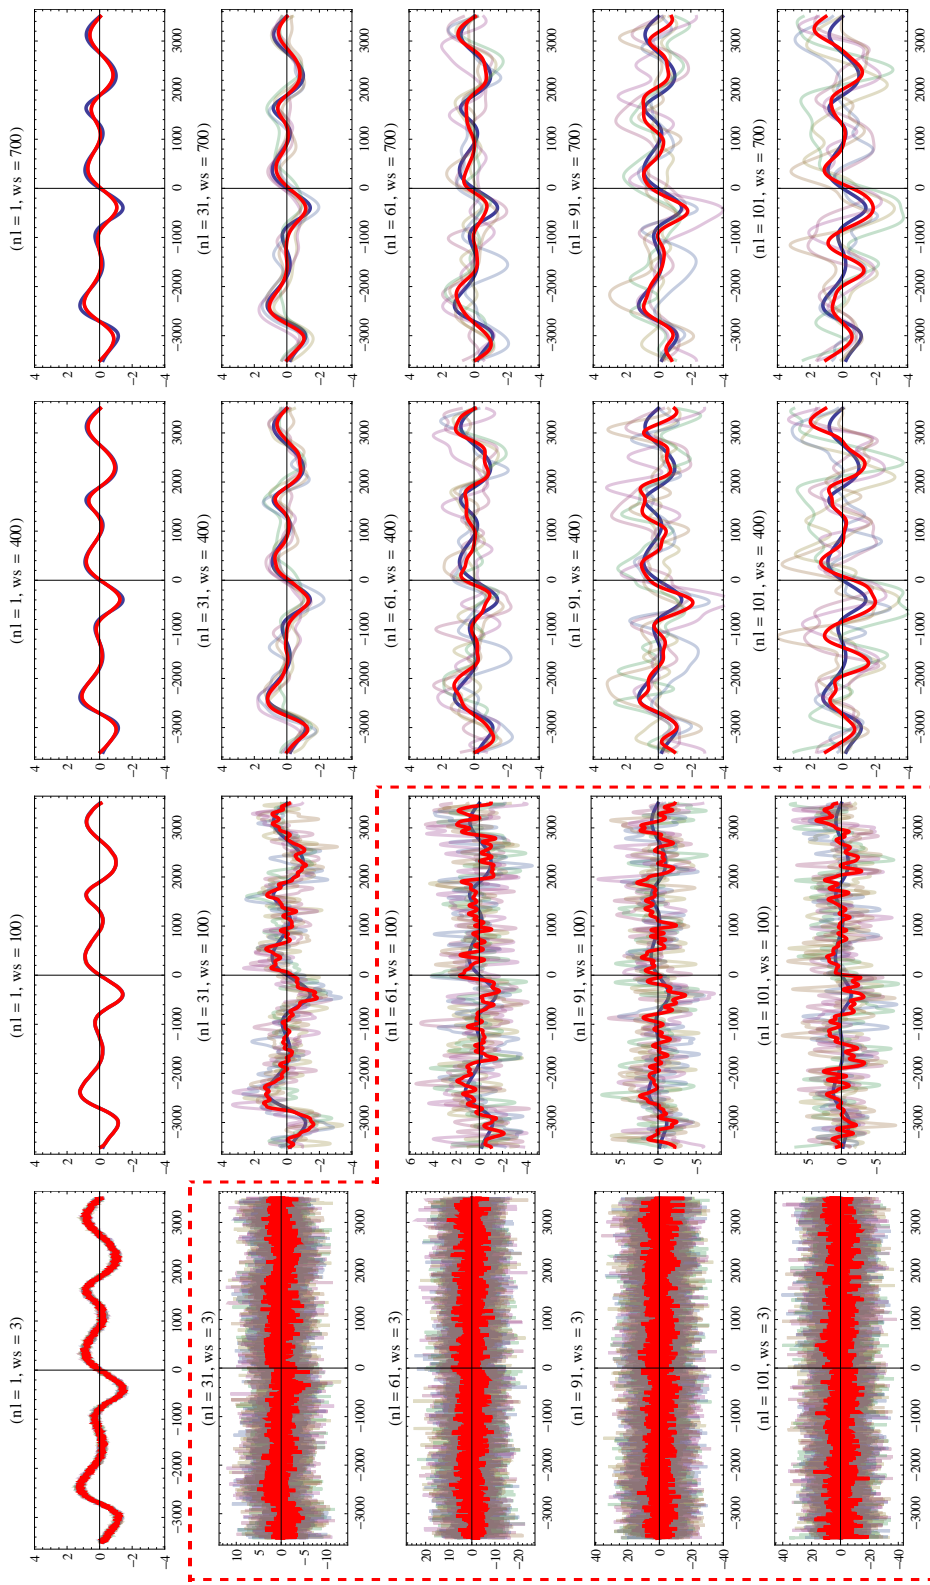

Different panels show the same hypothetical response function (in Blue). Each panel has 6 replicates (in dimmed colors) with various noise levels ( $nl$ )<sup>a</sup> overlaid and smoothed with various window sizes ( $ws$ ). The average of the replicates is shown in Red. Note that when the noise level is high, the replicates (of the response function with same noise level) behave very differently, but the original behavior is recovered upon averaging. The plots shown in dashed box are on different scales.

<sup>a</sup>See Suppl. Note 2.2 for a definition of noise level ( $nl$ ).

If it is not possible to do enormously large number of replicates (due to say economic reasons), the average of all the replicates done is a better measure than the individual experiments.

It may seem that a large number of replicates might be needed, but that is not true. For high noise experiments like microarrays, even for our low free energy effect, 3–4 replicates are sufficient to achieve an adequate level of accuracy (with meta-analysis this number comes down to 2–3 experiments).

## 1.2 Calibration for SNR extraction from a given data

The method described in the previous section can be evolved to generate a calibration for estimation of signal-to-noise ratio (SNR) (or noise levels)<sup>8</sup> from a given data provided that the data meets the criterion described in the previous section.

To calibrate, we first define a characteristic function based on known features of data. Then we overlay different levels of white noise on this data, which are equivalent to different replicates. At low noise each replicate closely mimics the original function. But as the noise levels go up, the replicates are averaged in different combinations of increasing numbers until we get a close fit to the original profile (see figure on page 3).

Several thousand simulations were run for various noise levels<sup>9</sup> (ranging between 1 to 100) on unit signal amplitudes<sup>10</sup> with a mix of various small frequencies (which were chosen based on our experimental data). Each of these noisy dataset is then smoothed for various window sizes ranging from 400 to 700 (see Table below). The standard deviation of the differences between original noisy dataset and smooth datasets gives a metric for the preselected window sizes. By averaging a large number of entries, coefficient table below was generated.

This coefficient table is then used to predict the noise levels of any given dataset. This prediction algorithm was tested on several thousand simulated datasets<sup>11</sup> generated for various noise levels (ranging between 1 to  $10^3$ ) on various signal amplitudes (ranging between  $10^{-4}$  to 10) with a mix of various small frequencies (which were much larger than experimental data).

---

about 50 times noise with only 6 replicates.

<sup>8</sup>See definition of noise level in Suppl. Note 2.2.

<sup>9</sup>See Suppl. Note 3.3 for the protocol used for simulating noisy data.

<sup>10</sup>Signal amplitude is defined as half of the difference between max and min values of all amplitudes.

<sup>11</sup>Each dataset is used alone, no replicates.

Table on the following page summarizes the prediction results.

Note that when we have some knowledge about the noise levels, we are able to successfully predict a much broader range, i.e. up to about noise level 40. However, when we have absolutely no knowledge about the noise level, we can still successfully predict the noise levels up to 23. Our meta-analysis data in Fig. 2 and 3 has a noise level of about 13, which is well within the successful prediction range.

The method presented here gives an unsupervised prediction of noise level. A supervised prediction (i.e. with more information about the data) will give better results, but the unsupervised method is sufficient for the present analysis.

This analysis can help predict the number of replicates needed, for a noisy experiment, up to a desired reproducibility-confidence-interval from just one experiment. A simulation on replicates shows that for noise levels at least up to 46, average of three replicates gives high enough noise reduction so that a fourth replicate doesn't add much improvement. This is a reconfirmation that for the purpose of this work 3 replicates are sufficient.

While generalizing this technique, the following facts must be kept in mind. The calibration (and smoothing) is a function of data size and density, frequency spectrum of the data, noise amplitude<sup>12</sup> and frequency etc. Although a complete analytical understanding of the calibration is beyond the scope of this paper, one can safely say that this method will work for very high noise levels for high frequency data also if the sampling frequency is sufficiently high.

---

<sup>12</sup>The dependence is only on the noise amplitude and not on the signal amplitude.

Calibrated correction coefficients for various window sizes.

| Window Size | Coeff   |
|-------------|---------|
| 400         | 3.46323 |
| 500         | 3.46300 |
| 600         | 3.46295 |
| 700         | 3.46295 |

Errors in prediction of noise for datasets with known or unknown noise levels.

| Known Noise Level | Stdev ( $\sigma$ ) of Prediction Errors | Unknown Noise Level | Stdev ( $\sigma$ ) of Prediction Errors |
|-------------------|-----------------------------------------|---------------------|-----------------------------------------|
| 1                 | 0                                       | 1                   | 0                                       |
| 2                 | 0                                       | 2                   | 0                                       |
| 3                 | 1                                       | 3                   | 0                                       |
| 4                 | 1                                       | 4                   | 1                                       |
| 5                 | 1                                       | 5                   | 1                                       |
| 6                 | 1                                       | 6                   | 1                                       |
| 7                 | 1                                       | 7                   | 1                                       |
| 8                 | 1                                       | 8                   | 1                                       |
| 9                 | 2                                       | 9                   | 1                                       |
| 10                | 2                                       | 10                  | 1                                       |
| 11                | 2                                       | 11                  | 1                                       |
| 12                | 2                                       | 12                  | 2                                       |
| 13                | 2                                       | 13                  | 2                                       |
| 14                | 3                                       | 14                  | 2                                       |
| 15                | 2                                       | 15                  | 2                                       |
| 16                | 2                                       | 16                  | 3                                       |
| 17                | 3                                       | 17                  | 3                                       |
| 18                | 2                                       | 18                  | 5                                       |
| 19                | 3                                       | 19                  | 4                                       |
| 20                | 3                                       | 20                  | 4                                       |
| 21                | 3                                       | 21                  | 6                                       |
| 22                | 3                                       | 22                  | 7                                       |
| 23                | 3                                       | 23                  | 16                                      |
| 24                | 4                                       | 24                  | 257                                     |
| 25                | 4                                       | 25                  | 1190                                    |
| 26                | 3                                       |                     |                                         |
| 27                | 4                                       |                     |                                         |
| 28                | 4                                       |                     |                                         |
| 29                | 6                                       |                     |                                         |
| 30                | 5                                       |                     |                                         |
| 31                | 5                                       |                     |                                         |
| 32                | 6                                       |                     |                                         |
| 33                | 6                                       |                     |                                         |
| 34                | 10                                      |                     |                                         |
| 35                | 8                                       |                     |                                         |
| 36                | 8                                       |                     |                                         |
| 37                | 9                                       |                     |                                         |
| 38                | 7                                       |                     |                                         |
| 39                | 10                                      |                     |                                         |
| 40                | 12                                      |                     |                                         |

## 2 Definitions

### 2.1 Signal-to-Noise Ratio

The signal-to-noise ratio is a commonly used term to describe the signal corruption by noise, and is defined as the ratio of signal power to the noise power, see Eq. 1, where  $A$  is the root mean square amplitude. For more details please see [3].

$$SNR = \frac{P_{signal}}{P_{noise}} = \left( \frac{A_{signal}}{A_{noise}} \right)^2 \quad (1)$$

### 2.2 Noise Level

The signal-to-noise ratio, as defined in the previous section, has its origins in electrical engineering where it relates to the ratio of powers in signal and noise. For the convenience of remembering, and ease of intuitive understanding, we define a new term *noise level*. Eq. 2 defines the *noise level* in terms of the signal and noise amplitudes ( $a$ ), which are given by the difference between max and min values of the amplitudes.

$$nl = 2 \frac{a_{noise}}{a_{signal}} \simeq \frac{2}{\sqrt{SNR}} \quad (2)$$

Eq. 2 suggests that, a noise level of 10 would mean that the noise amplitude is 5 times larger than the signal amplitude.<sup>13</sup> In other words, one unit of signal is buried in 5 units of noise.

---

<sup>13</sup>See Suppl. Note 3.3 for how this definition is used to simulate noisy data.

## 2.3 Definition of Sets

| Ratio                                  | Short                                                                               | Description                                                                                                       | Equivalence                                                                                                                               |
|----------------------------------------|-------------------------------------------------------------------------------------|-------------------------------------------------------------------------------------------------------------------|-------------------------------------------------------------------------------------------------------------------------------------------|
| $\frac{XL}{nXL}$                       | $CL \rightarrow \log_2\left(\frac{XL}{nXL}\right)$                                  | Relative enrichment of cross-linked DNA (or psoralen intercalation) in untreated (no drug treatment) Raji B cells | Psoralen binding due to a combined effects of sequence, inherent chromatin structure and transcriptionally generated dynamic supercoiling |
| $\frac{XL(DRB)}{nXL(DRB)}$             | $CL(DRB) \rightarrow \log_2\left(\frac{XL(DRB)}{nXL(DRB)}\right)$                   | Relative enrichment of cross-linked DNA (or psoralen intercalation) in DRB treated cells                          | Psoralen binding mainly due to sequence and inherent chromatin structure (DRB would inhibit transcription, so no dynamic supercoiling)    |
|                                        | $\Delta CL \rightarrow CL(DRB) - CL$                                                |                                                                                                                   | Transcription generated dynamic DNA supercoiling (due to ongoing transcription)                                                           |
| $\frac{XL(CPT)}{nXL(CPT)}$             | $CL(CPT) \rightarrow \log_2\left(\frac{XL(CPT)}{nXL(CPT)}\right)$                   | Relative enrichment of cross-linked DNA (or psoralen intercalation) in camptothecin treated cells                 |                                                                                                                                           |
|                                        | $\Delta CL(CPT) \rightarrow CL(DRB) - CL(CPT)$                                      |                                                                                                                   | Transcription generated dynamic DNA supercoiling in cells treated with CPT                                                                |
| $\frac{XL(\beta Lap)}{nXL(\beta Lap)}$ | $CL(\beta Lap) \rightarrow \log_2\left(\frac{XL(\beta Lap)}{nXL(\beta Lap)}\right)$ | Relative enrichment of cross-linked DNA (or psoralen intercalation) in $\beta$ -lapachone treated cells           |                                                                                                                                           |
|                                        | $\Delta CL(\beta Lap) \rightarrow CL(DRB) - CL(\beta Lap)$                          |                                                                                                                   | Transcription generated dynamic DNA supercoiling in cells treated with $\beta$ Lap                                                        |

## 2.4 General Definitions

### Meta Analysis

During meta-analysis we average multiple transcribed regions by aligning transcribed regions at the transcription start sites ( $\pm 8,000$  bp). For all our analysis we have averaged the raw data, and smoothed only the final average. The ratios are calculated for each individual probe of microarray.

### Expression Levels

Expression levels were defined as the average of the scores (or signal) for all probes of an annotated gene body.<sup>14</sup> We had 3 replicates of the expression array hybridizations, and average of expression levels from these

<sup>14</sup>In other words the total score, normalized by the number of probes.



three experiments were used for further calculations. The expression level is calculated from raw data which was baseline shifted (no smoothing).

### **Expression Level Classes**

Once the expression levels were defined, we classified data in several groups (decades, quintiles, quartiles, tertiles etc.). After looking at these different groups, it was apparent that at the level of resolution of our experiments, the data is best viewed in quintiles. For simplicity of explanation, transcribed regions were classified in three categories (based on the expression levels): Low (0–20%, 20–40%), medium (40–60%, 60–80%), high (80–100%).

## **2.5 Baseline Shifting**

Since we expect ratios to be small,<sup>15</sup> we normalize the entire hybridization experiment so as to bring the overall baseline across the chromosome to zero. This is achieved simply by averaging the ratios of all probes across the chromosomes, and subtracting the average from all the probes.

We also used the same concept baseline shifting to remove the sequence dependent bias of psoralen for DNA intercalation.<sup>16</sup>

# **3 Analysis Methods**

## **3.1 Data Analysis**

Owing to the small free energy of intercalation of psoralen, the hybridization data was noisy, and had a very small signal to noise ratio.<sup>17</sup> The appearance of the raw data (for all regions) suggested that there was significant high frequency noise (i.e. large variations over short lengths along the DNA). Considering the magnitude of the bending and torsional persistence lengths for DNA ~50–100 nm (about 150–300 bp) [4], variation in supercoiling occurring on a much shorter scale is unlikely unless accompanied by a dramatic structural transitions, almost certainly an infrequent

---

<sup>15</sup>Because psoralen has a small free energy corresponding to interaction in negatively supercoiled DNA. Moreover, it does have some affinity for intercalation in relaxed DNA as well. Also, see Suppl. Note 1.1.

<sup>16</sup>Also see Suppl. Note 3.2.

<sup>17</sup>See Suppl. Note 1.1.

phenomenon. Therefore the high frequency fluctuations were attributed to noise.

In order to suppress this noise, we used a technique called Fourier Convolution Smoothing (FCS) to smooth the data [2]. The benefit of FCS is that it dampens the high frequency noise much more than the low frequency noise. The technique uses moving window average as a reference,<sup>18</sup> as a result of which the local features are not lost during an unsupervised noise reduction.

Our microarrays are designed with each probe having 50 bp and a 12 bp overlap (i.e. 38 bp are unique between successive probes). So for any given region of genome or an individual transcribed region, we have a data density of 38 bp per data point (i.e. per probe). While doing the meta-analysis,<sup>19</sup> we align all the transcribed regions on the transcription start sites (TSS). Since the TSS are randomly distributed with respect to probes, for the meta-analysis the data density increases to 1.4 bp per data point. The meta-analysis presented in this study uses a window size of 400 data points (equivalent to 561 bp).

Based on the DNA properties, we improvised upon the previously described FCS technique to fit it for our data. The ENCODE data on Nimblegen microarrays was not continuous, so whenever we had a break of 600 bp or more (i.e. abt 15 probes), those data points were separated into distinct groups, and smoothed individually. Continuous regions with less than 400 probes were also dropped from individual transcribed regions.

Our Nimblegen ENCODE (*hg18*) microarrays had usable data for a total of 855 transcribed regions. Since many of these regions were overlapping, there was a possibility of over-representing a specific gene. In order to avoid this we identified clusters of transcripts/genes that were overlapping or had a TSS within 50 bp of each other; and used only the largest of “transcribed region” from each of these groups. This brought down the total number of transcribed regions to 445 (with 415 unique genes). See the list of these transcribed regions in Table 1.

### **3.2 Sequence Dependent Background Correction**

These 445 transcribed regions were sorted based on the expression levels<sup>20</sup> and segregated in various quantiles (decades, quintiles, quartiles,

---

<sup>18</sup>With a pre-decided window-size (*ws*), the only parameter used for smoothing.

<sup>19</sup>See Suppl. Note 2.4 for definition.

<sup>20</sup>See definition in Suppl. Note 2.4.

tertiles etc.). When meta-analysis<sup>21</sup> was performed for all 445 transcribed regions in these quantiled datasets, we observed a graded difference in baselines for each quantile.<sup>22</sup>

We wanted to understand this difference, and explain it. It is well known that psoralen has a sequence dependant bias for intercalation in DNA. So we sorted the transcribed regions based on the AT content within  $\pm 3,000$  bp of TSS (instead of sorting them by expression). In the meta-analysis, it was very obvious that the AT-rich transcribed regions had a much higher psoralen intercalation, irrespective of expression level. So we have decided to do an AT content dependent baseline shift for different transcribed regions. To reduce systematic errors, these 445 transcribed regions were divided in 10 groups (each having about 44–45 transcribed regions). Now a correction term, for each of the decades, was calculated by averaging the raw ratios in the flanking regions of (-8,000, -2,000) bp and (2,000, 8,000) bp (about TSS) of the constituent transcribed regions.<sup>23</sup> The data for each of the constituent transcribed regions is then baseline shifted using this correction term to get the corrected data, which is used for further analysis.<sup>24</sup>

### 3.3 Addition of Noise Levels in Simulations

There are several ways one could add noise on a pure signal. For our simulations, we used the following protocol for noise addition: For a given dataset and noise level (say  $nl$ ) we generate dataset of equal length such that each point is the product of  $nl$  and a (pseudo) random number in the range of  $-\frac{1}{2}$  and  $+\frac{1}{2}$ .<sup>25</sup>

---

<sup>21</sup>See definition in Suppl. Note 2.4.

<sup>22</sup>The low expression quantiles had a higher baseline than the high expressing quantiles.

<sup>23</sup>If we had enough data points for all the transcribed regions, we could in principle do a baseline shift based on the flank psoralen profile of each individual gene, but due to lack of continuous data points, we have decided to use the the flanks: (-8,000, -2,000) bp and (2,000, 8,000) bp (about TSS).

<sup>24</sup>All the processing was done on raw data, and smoothing was applied only in final step to remove the high frequency noise.

<sup>25</sup>Another possibility could be to use a Gaussian distribution with mean,  $\mu = 0$ , and standard deviation,  $\sigma = nl$ .

### 3.4 Pausing index of RNA polymerase II

Pol II pausing (or stalling) index ([5], [6]) is a measure that reflects the dynamics of Pol II assembly and promoter clearance. It represents the ratio of Pol II read density around TSS (1 kb region centered at TSS) over the average read density in the gene body (starting 750 bp downstream of TSS). Genes were split into three groups as follows: paused – the pausing index above 6 and no detectable Pol II in gene body ( $p = 0.05$ ), elongating the pausing index between 0.5 and 6, and detectable Pol II in TSS and gene body regions, and silent no detectable Pol II signal in TSS and gene body regions.

### 3.5 Gene body analysis

As shown in Table 1, we have a total of 445 genes. Suppl. Fig. 1a shows the average  $\Delta CL$  profile for all 445 genes starting from the TSS to 4 kb into the gene body. Out of these 445 genes, 29 genes are shorter than 1 kb, 35 are in range 1-2 kb, 38 are in range 2-3 kb and 24 in 3-4 kb range. The remaining 319 genes are larger than 4 kb. For the analysis, only the data in the gene body was considered, i.e. data after the transcription termination site to 4 kb was dropped in Suppl. Fig. 1(a).

### 3.6 Enhancers and CTCF sites

The list of enhancers and CTCF sites in GM06990 B-lymphocyte cells were obtained from Heintzman et al. ([7]) study, where the detailed identification procedure is presented. All coordinates were converted from *hg17* to *hg18* human genome version using liftOver program (UCSC tools set). Only enhancers with significant Pol II signal were considered.

In order to understand the interaction of enhancers and CTCF sites with the dynamic supercoiling the lists were divided into two parts. The elements that are in or within  $\pm 3,000$  bp of the gene body (proximal) or are more than  $\pm 3,000$  bp away from the gene body (distal). Out of 463 enhancers (127 proximal, 336 distal) only 122 proximal and 111 distal enhancers had data near ENCODE regions. All of 729 CTCF sites (444 proximal, 285 distal) had some ENCODE data within  $\pm 5,000$  bp of the sites. The results are plotted in Suppl. Fig. 1 (b) and (c). These lists were further studied by classification based on presence or absence of Pol II (data to be deposited online).

### 3.7 Analysis of divergent promoters

It has been previously shown (*in-vivo*) using a model system that divergent promoters generate a higher level of negative supercoiling in their shared upstream region [8]. We wanted to test the generality of this observation in our data.

It is known that Pol II footprint is about 40 bp and we have already seen that the effect of transcription generated dynamic supercoiling travels about 1,500 bp upstream of the transcribing Pol II. Therefore, we analyzed all the divergent promoters in our gene-list which were separated by more than 100 bp but less than 4,000 bp. There were a total of only 23 such promoter pairs in our ENCODE array. The average  $\Delta CL$  profile about the TSS for all these divergent promoters is shown in Suppl. Fig. 1. The shaded range shows the  $\mu \pm \sigma$  region obtained by averaging 30 randomizations of an equivalent number of genes excluding divergent promoters.

Considering our discussion in previous sections, one of the reasons for the absence of a statistically significant difference is that the number of promoter pairs is very small. Moreover, only 7 out of 23 promoter pairs were expressed in our experiments. Since mutual reinforcement of supercoiling would need simultaneous (or near simultaneous) firing of these promoters. So these data neither confirm nor refute the previous (*in-vivo*) observations of accumulation of negative supercoils in the shared upstream regions of the divergent promoters [8].

### 3.8 3D profiles

To generate the 3D profiles in Fig. 4(a) a moving window average with 20% genes was taken after sorting them based on the expression level. More specifically, the expression level sorted list of 445 genes was divided in successive overlapping groups of 89 genes (i.e. 20% of the 445 genes) giving a total of 357 such groups. These groups were individually averaged and smoothed (as described in Suppl. Note 3.1), and the resulting data were used to generate the 3D profiles in Fig. 4(a).

## References

- [1] R R Sinden, J O Carlson, and D E Pettijohn. Torsional tension in the dna double helix measured with trimethylpsoralen in living e. coli cells: analogous measurements in insect and human cells. *Cell*, 21(3):773–783, Oct 1980.

- [2] M K Raghuraman, E A Winzeler, D Collingwood, S Hunt, L Wodicka, A Conway, D J Lockhart, R W Davis, B J Brewer, and W L Fangman. Replication dynamics of the yeast genome. *Science*, 294(5540):115–121, Oct 2001.
- [3] Wikipedia. Signal-to-noise ratio - wikipedia, the free encyclopedia. [http://en.wikipedia.org/wiki/Signal-to-noise\\_ratio](http://en.wikipedia.org/wiki/Signal-to-noise_ratio). [Online; accessed 31-March-2012].
- [4] C Lavelle. Forces and torques in the nucleus: chromatin under mechanical constraints. *Biochem Cell Biol*, 87(1):307–322, Feb 2009.
- [5] J Zeitlinger, A Stark, M Kellis, J W Hong, S Nechaev, K Adelman, M Levine, and R A Young. Rna polymerase stalling at developmental control genes in the drosophila melanogaster embryo. *Nat Genet*, 39(12):1512–1516, Dec 2007.
- [6] G W Muse, D A Gilchrist, S Nechaev, R Shah, J S Parker, S F Grissom, J Zeitlinger, and K Adelman. Rna polymerase is poised for activation across the genome. *Nat Genet*, 39(12):1507–1511, Dec 2007.
- [7] N D Heintzman, G C Hon, R D Hawkins, P Kheradpour, A Stark, L F Harp, Z Ye, L K Lee, R K Stuart, C W Ching, K A Ching, J E Antosiewicz-Bourget, H Liu, X Zhang, R D Green, V V Lobanenko, R Stewart, J A Thomson, G E Crawford, M Kellis, and B Ren. Histone modifications at human enhancers reflect global cell-type-specific gene expression. *Nature*, 459(7243):108–112, May 2009.
- [8] F Kouzine, S Sanford, Z Elisha-Feil, and D Levens. The functional response of upstream dna to dynamic supercoiling in vivo. *Nat Struct Mol Biol*, 15(2):146–154, Feb 2008.
